# Supplementary material for: β-Cyclodextrin modified graphitic carbon nitride for the removal of pollutants from aqueous solution: experimental and theoretical calculation study
Source: Royal Society of Chemistry journal article supplement (doi:10.1039/c6ta05958a), 2016-01-01
Supplement: c6ta05958a1.pdf [file c6ta05958a1.pdf]

1  
2  
3  
4  
5  
6  
7  
8  
9  
10  
11  
12  
13  
14  
15  
16  
17  
18  
19  
20  
21  
22  
23  
24  
25  
26

## Supporting Information for

### **$\beta$ -cyclodextrin modified graphitic carbon nitride for the removal of pollutants from aqueous solution: combined experiments and theoretical calculation study**

**Yidong Zou<sup>a,b</sup>, Xiangxue Wang<sup>a,c</sup>, Yuejie Ai<sup>a\*</sup>, Yunhai Liu<sup>b</sup>, Yongfei Ji<sup>d</sup>, Hongqing  
Wang<sup>e</sup>, Tasawar Hayat<sup>f</sup>, Ahmed Alsaedif, Wenping Hu<sup>g\*</sup>, Xiangke Wang<sup>a,d,e\*</sup>**

*<sup>a</sup>School of Environment and Chemical Engineering, North China Electric Power  
University, Beijing 102206, P. R. China*

*<sup>b</sup>School of Chemistry, Biological and Materials Sciences, East China Institute of  
Technology, Nanchang, 330013, P. R. China*

*<sup>c</sup>Collaborative Innovation Center of Radiation Medicine of Jiangsu Higher Education  
Institutions and School for Radiological and Interdisciplinary Sciences, Soochow  
University, 215123, Suzhou, P.R. China*

*<sup>d</sup>Theoretical Chemistry and Biology, School of Biotechnology, Royal Institute of  
Technology, Roslagstullsbacken 15, 10691 Stockholm, Sweden*

*<sup>e</sup>Collaborative School of Chemistry and Chemical Engineering, University of South  
China, 28 Changsheng West Road, Hengyang, Hunan 421001, P.R. China*

*<sup>f</sup>NAAM Research Group, Faculty of Science, King Abdulaziz University, Jeddah 21589,  
Saudi Arabia*

*<sup>g</sup>Key Laboratory of Organic Solids, Institute of Chemistry, Chinese Academy of Sciences,  
Beijing 100190, P. R. China*

\*: Corresponding author. Email: [xkwang@ipp.ac.cn](mailto:xkwang@ipp.ac.cn) or [xkwang@ncepu.edu.cn](mailto:xkwang@ncepu.edu.cn) (X.  
Wang); Tel: +86-10-61772890; Fax: +86-10-61772890. Yidong Zou:  
[zouyidong217@126.com](mailto:zouyidong217@126.com); Xiangxue Wang: [wang730304@163.com](mailto:wang730304@163.com); Yuejie Ai:  
[aiyuejie314@126.com](mailto:aiyuejie314@126.com); Yunhai Liu: [walton\\_liu@163.com](mailto:walton_liu@163.com); Yongfei Ji: [jyfei@kth.se](mailto:jyfei@kth.se);

27 Hongqing Wang: hqwang2001cn@126.com; Tasawar Hayat; [tahaksag@yahoo.com](mailto:tahaksag@yahoo.com); A.  
28 Alsaedi: [aalsaedi@hotmail.com](mailto:aalsaedi@hotmail.com); Wenping Hu: [huwp@iccas.ac.cn](mailto:huwp@iccas.ac.cn).

29 **The SI contains 11 pages with 6 Figures and 10 Tables.**

30 **1. Preparation of graphitic carbon nitride (g-C<sub>3</sub>N<sub>4</sub>).**

31 All chemicals used in the experiments were purchased in analytic purity and used  
32 without any further purification. g-C<sub>3</sub>N<sub>4</sub> was prepared by the pyrolysis of urea in a  
33 semiclosed system according to a reported procedure<sup>1</sup>. Typically, 25 g of urea crystals  
34 was dried at 70 °C for 24 h, and then put into an alumina crucible with a cover and heated  
35 at 500 °C in a muffle furnace for 3.5 h with a ramp rate of 4.0 °C min<sup>-1</sup> under ambient  
36 pressure in air. The resultant yellow powder was collected by centrifugation and rinsed  
37 with Milli-Q water (18.2 MΩ·cm<sup>-1</sup>) and 0.1 M HNO<sub>3</sub> several times, and then dried under  
38 vacuum at 60 °C for 24 h prior to further use.

39

40 **2. Preparation of β-cyclodextrin modified graphitic carbon nitride (g-C<sub>3</sub>N<sub>4</sub>/β-CD).**

41 g-C<sub>3</sub>N<sub>4</sub>/β-CD was synthesized by the facial solvothermal method with the as-  
42 prepared g-C<sub>3</sub>N<sub>4</sub> as a soft template. Briefly, aqueous suspension of as-prepared g-C<sub>3</sub>N<sub>4</sub>  
43 (5.0 g) in 30 mL of distilled water was added to the solution of 2.0 g β-cyclodextrin (β-  
44 CD) in 20 mL of distilled water at room temperature, and followed by the addition of 0.5  
45 mL 1 M NaOH solution and 0.02 g potassium persulfate (K<sub>2</sub>S<sub>2</sub>O<sub>8</sub>) as an initiator. The  
46 mixture was stirred until the solution became transparent, sealed in an autoclave, heated  
47 to 180 °C and maintained at 180 °C for 12 h. The resulted products were washed with  
48 Milli-Q water and ethanol several times, and dried in vacuum at 60 °C. Milli-Q water  
49 (18.2 MΩ·cm<sup>-1</sup>) was used in all the experiments.

50 **3. UV-vis absorption spectroscopy of MO.**

51 In order to search the optimize peak for the measurement of MO concentrations, the  
52 absorbance of MO was determined at various concentrations by UV-vis  
53 spectrophotometry (Shimadzu UV-2550). The UV-vis absorption spectroscopy results for  
54 MO are presented in **Figure S1**. The optimum wavelength of MO was determined to be  
55 464 nm (**Figure S1(a)**), and an  $R^2 > 0.99$  for the calibration curve of MO at 464 nm  
56 suggested that the MO absorbance results can be directly correlated to their  
57 concentrations (**Figure S1(b)**).

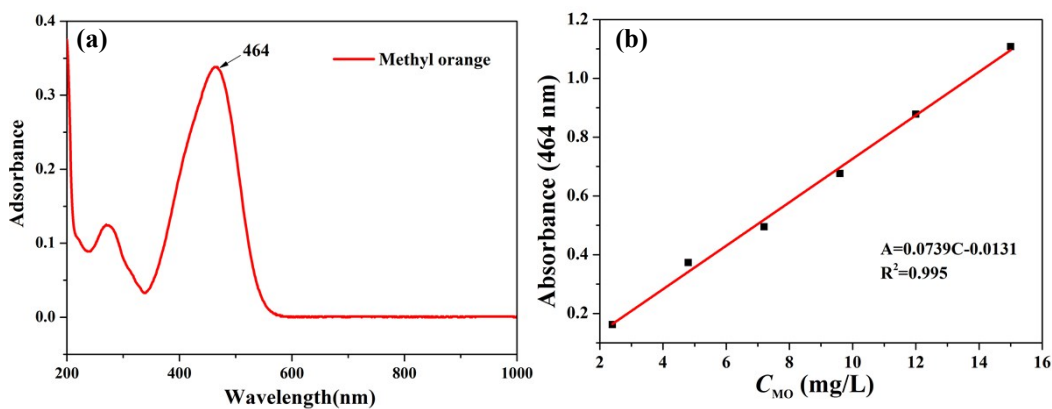

58

59 **Figure S1.** UV-vis absorption spectroscopy of MO as a function of MO concentrations. (A)  
60 Wavelength scan of MO, (B) Absorbance as a function of MO concentration at the wavelength of  
61 464 nm.

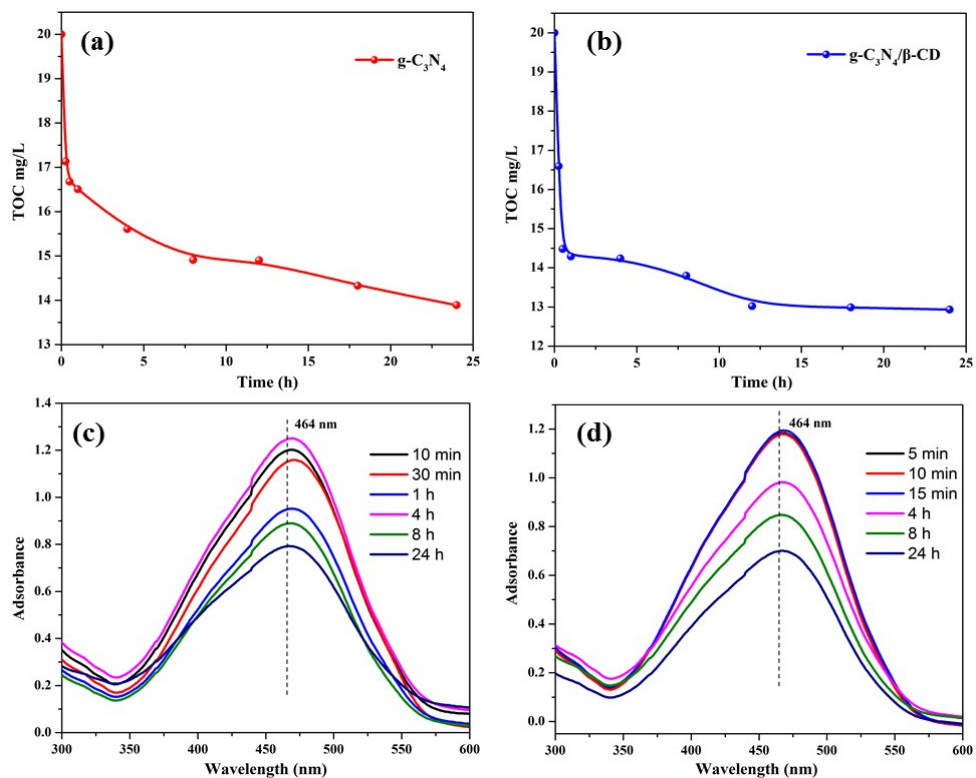

62

63 **Figure S2.** The TOC removal curve of MO on g-C<sub>3</sub>N<sub>4</sub> (a) and on g-C<sub>3</sub>N<sub>4</sub>/β-CD (b), and the UV-  
 64 vis spectra of MO in a g-C<sub>3</sub>N<sub>4</sub> (c) or g-C<sub>3</sub>N<sub>4</sub>/β-CD (d) aqueous solutions as a function of reaction  
 65 time.

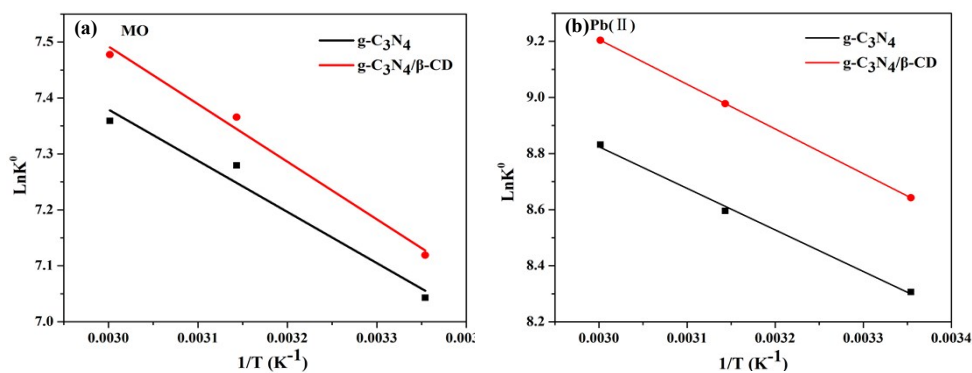

66

67 **Figure S3.** Linear plots of  $\ln K^0$  versus  $1/T$  for the adsorption of MO (a) and Pb(II) (b) on g-C<sub>3</sub>N<sub>4</sub>  
 68 and g-C<sub>3</sub>N<sub>4</sub>/β-CD.

69

70

71 **Table S1** Relative Contents of Different Groups of g-C<sub>3</sub>N<sub>4</sub> and g-C<sub>3</sub>N<sub>4</sub>/β-CD Charactrized from  
 72 XPS Analysis (N 1s Spectrum)

| Samples                               | C=N-C   | N-(C) <sub>3</sub> or H-N-(C) <sub>2</sub> | Heterocycles rings |
|---------------------------------------|---------|--------------------------------------------|--------------------|
| g-C <sub>3</sub> N <sub>4</sub>       | 50.76 % | 40.08 %                                    | 9.16 %             |
| g-C <sub>3</sub> N <sub>4</sub> /β-CD | 8.44 %  | 91.56 %                                    | 0.00 %             |

73

74 **Table S2** Relative Contents of Different Groups of g-C<sub>3</sub>N<sub>4</sub> and g-C<sub>3</sub>N<sub>4</sub>/β-CD Charactrized from  
 75 XPS Analysis (C 1s Spectrum)

| Samples                               | non-oxygenated ring | graphitic carbon | N-C=N   | O-C=O   |
|---------------------------------------|---------------------|------------------|---------|---------|
| g-C <sub>3</sub> N <sub>4</sub>       | 29.57 %             | 5.18 %           | 65.25 % | 0.00 %  |
| g-C <sub>3</sub> N <sub>4</sub> /β-CD | 39.84 %             | 8.02 %           | 20.37 % | 31.77 % |

76

77 **Table S3** Kinetic parameters for MO and Pb(II) adsorption on g-C<sub>3</sub>N<sub>4</sub> and g-C<sub>3</sub>N<sub>4</sub>/β-CD

| Adsorbents                            | Adsorbates | Pseudo-first-order                   |                               |       | Pseudo-second-order                  |                                                   |       |
|---------------------------------------|------------|--------------------------------------|-------------------------------|-------|--------------------------------------|---------------------------------------------------|-------|
|                                       |            | $q_{1,cal}$<br>(mg·g <sup>-1</sup> ) | $k_1$<br>(min <sup>-1</sup> ) | $R^2$ | $q_{2,cal}$<br>(mg·g <sup>-1</sup> ) | $k_2$<br>(g·mg <sup>-1</sup> ·min <sup>-1</sup> ) | $R^2$ |
| g-C <sub>3</sub> N <sub>4</sub>       | Pb(II)     | 6.87                                 | 2.0×10 <sup>-3</sup>          | 0.408 | 16.11                                | 1.5×10 <sup>-4</sup>                              | 0.988 |
| g-C <sub>3</sub> N <sub>4</sub> /β-CD | Pb(II)     | 9.89                                 | 1.8×10 <sup>-3</sup>          | 0.775 | 19.05                                | 2.2×10 <sup>-4</sup>                              | 0.989 |
| g-C <sub>3</sub> N <sub>4</sub>       | MO         | 14.20                                | 3.3×10 <sup>-3</sup>          | 0.828 | 24.93                                | 1.7×10 <sup>-4</sup>                              | 0.989 |
| g-C <sub>3</sub> N <sub>4</sub> /β-CD | MO         | 23.44                                | 2.0×10 <sup>-3</sup>          | 0.825 | 31.85                                | 1.2×10 <sup>-4</sup>                              | 0.99  |

78

80 **Table S4.** Parameters of various adsorption isotherms of Pb(II) adsorption on g-C<sub>3</sub>N<sub>4</sub> and g-C<sub>3</sub>N<sub>4</sub>/β-  
 81 CD at three temperatures (298.15 K, 318.15 K, and 338.15 K).

| Adsorbents       | Parameters                                                  | g-C <sub>3</sub> N <sub>4</sub> [Pb(II)] |          |          | g-C <sub>3</sub> N <sub>4</sub> /β-CD [Pb(II)] |          |          |
|------------------|-------------------------------------------------------------|------------------------------------------|----------|----------|------------------------------------------------|----------|----------|
|                  |                                                             | 298.15 K                                 | 318.15 K | 333.15 K | 298.15 K                                       | 318.15 K | 333.15 K |
| Langmuir model   | $K_L$ (L·mg <sup>-1</sup> )                                 | 0.051                                    | 0.043    | 0.049    | 0.040                                          | 0.051    | 0.068    |
|                  | $q_m$ (mg·g <sup>-1</sup> )                                 | 71.1                                     | 104.1    | 118.3    | 100.5                                          | 118.9    | 128.5    |
|                  | $R^2$                                                       | 0.931                                    | 0.934    | 0.918    | 0.945                                          | 0.943    | 0.952    |
| Freundlich model | $K_F$ (mg <sup>1-n</sup> ·L <sup>n</sup> ·g <sup>-1</sup> ) | 6.3                                      | 7.5      | 9.2      | 6.5                                            | 9.8      | 13.6     |
|                  | $1/n_F$                                                     | 0.558                                    | 0.606    | 0.604    | 0.625                                          | 0.593    | 0.554    |
|                  | $R^2$                                                       | 0.863                                    | 0.868    | 0.851    | 0.893                                          | 0.875    | 0.873    |
| Sips model       | $K_S$ (L·g <sup>-1</sup> )                                  | 2.112                                    | 2.034    | 2.028    | 1.874                                          | 1.905    | 1.838    |
|                  | $a_s$ (L·mg <sup>-1</sup> )                                 | 0.008                                    | 0.009    | 0.011    | 0.011                                          | 0.015    | 0.025    |
|                  | $n_s$                                                       | 0.408                                    | 0.581    | 0.842    | 0.719                                          | 1.129    | 2.199    |
|                  | $R^2$                                                       | 0.988                                    | 0.986    | 0.964    | 0.982                                          | 0.984    | 0.993    |

82

83 **Table S5.** Parameters of various adsorption isotherms of MO adsorption on g-C<sub>3</sub>N<sub>4</sub> and g-C<sub>3</sub>N<sub>4</sub>/β-CD  
 84 at three temperatures (298.15 K, 318.15 K, and 338.15 K).

| Adsorbents       | Parameters                                                  | g-C <sub>3</sub> N <sub>4</sub> [MO] |          |          | g-C <sub>3</sub> N <sub>4</sub> /β-CD [MO] |          |          |
|------------------|-------------------------------------------------------------|--------------------------------------|----------|----------|--------------------------------------------|----------|----------|
|                  |                                                             | 298.15 K                             | 318.15 K | 333.15 K | 298.15 K                                   | 318.15 K | 333.15 K |
| Langmuir model   | $K_L$ (L·mg <sup>-1</sup> )                                 | 0.111                                | 0.086    | 0.098    | 0.099                                      | 0.086    | 0.114    |
|                  | $q_m$ (mg·g <sup>-1</sup> )                                 | 59.1                                 | 77.2     | 82.2     | 67.9                                       | 85.1     | 87.6     |
|                  | $R^2$                                                       | 0.861                                | 0.934    | 0.955    | 0.890                                      | 0.924    | 0.952    |
| Freundlich model | $K_F$ (mg <sup>1-n</sup> ·L <sup>n</sup> ·g <sup>-1</sup> ) | 14.084                               | 13.764   | 16.115   | 15.830                                     | 16.999   | 20.434   |
|                  | $1/n_F$                                                     | 0.339                                | 0.406    | 0.390    | 0.339                                      | 0.374    | 0.351    |
|                  | $R^2$                                                       | 0.929                                | 0.972    | 0.973    | 0.953                                      | 0.974    | 0.974    |
| Sips model       | $K_S$ (L·g <sup>-1</sup> )                                  | 13.295                               | 13.681   | 14.852   | 15.867                                     | 16.986   | 19.948   |
|                  | $a_s$ (L·mg <sup>-1</sup> )                                 | 0.011                                | 0.020    | 0.097    | 0.009                                      | 0.036    | 0.117    |
|                  | $n_s$                                                       | 0.265                                | 0.433    | 0.564    | 0.347                                      | 0.364    | 0.506    |
|                  | $R^2$                                                       | 0.921                                | 0.968    | 0.975    | 0.947                                      | 0.970    | 0.976    |

85

86

87

88

89

90

91

92 **Table S6** Comparison of the thermodynamic parameters and adsorption capacities of MO and  
 93 Pb(II) with previous related studies at 298.15 K.

| Adsorbents                                                       | Thermodynamic parameters |                                         |                         | Sorption              | Ref.      |
|------------------------------------------------------------------|--------------------------|-----------------------------------------|-------------------------|-----------------------|-----------|
|                                                                  | $\Delta H^0$             | $\Delta S^0$                            | $\Delta G^0$            | Capacity              |           |
|                                                                  | (kJ·mol <sup>-1</sup> )  | (J·mol <sup>-1</sup> ·K <sup>-1</sup> ) | (kJ·mol <sup>-1</sup> ) | (mg·g <sup>-1</sup> ) |           |
| <b>Pb(II)</b>                                                    |                          |                                         |                         |                       |           |
| Kaolinite                                                        | -46.50                   | -166.40                                 | -50.40                  | 11.5                  | [2]       |
| Na-bentonite                                                     | 27.64                    | 162.24                                  | -20.73                  | 47.8                  | [3]       |
| Sporopollenin                                                    | 31.97                    | 150.98                                  | -13.78                  | 8.5                   | [4]       |
| Iron oxide                                                       | 8.10                     | 87.10                                   | -17.90                  | 36.0                  | [5]       |
| Siderite                                                         | 49.73                    | 261.00                                  | -28.18                  | 10.3                  | [6]       |
| Coconut-shell                                                    | 93.42                    | 312.27                                  | -2.79                   | 26.5                  | [7]       |
| Kaolinite clay                                                   | -47.21                   | -93.61                                  | -19.82                  | 31.75                 | [8]       |
| g-C <sub>3</sub> N <sub>4</sub>                                  | 12.32                    | 110.33                                  | -30.12                  | 71.1                  | This work |
| g-C <sub>3</sub> N <sub>4</sub> /β-CD                            | 13.24                    | 116.26                                  | -31.74                  | 100.5                 | This work |
| <b>MO</b>                                                        |                          |                                         |                         |                       |           |
| Carbon nanotubes                                                 | 19.39                    | 101.50                                  | -27.62                  | 35.4                  | [9]       |
| CMK-3                                                            | -23.14                   | -9.10                                   | -25.85                  | 294.1                 | [10]      |
| Modified silkworm<br>exuviae                                     | 2.54                     | 19.55                                   | -3.37                   | 87.0                  | [11]      |
| γ-Fe <sub>2</sub> O <sub>3</sub> /SiO <sub>2</sub> /<br>chitosan | -17.51                   | -48.89                                  | -2.25                   | 34.29                 | [12]      |
| m-CS/γ-Fe <sub>2</sub> O <sub>3</sub> /<br>MWCNTs                | -9.94                    | -20.65                                  | -3.78                   | 66.09                 | [13]      |
| g-C <sub>3</sub> N <sub>4</sub>                                  | 7.61                     | 84.17                                   | -17.49                  | 59.1                  | This work |
| g-C <sub>3</sub> N <sub>4</sub> /β-CD                            | 8.56                     | 87.98                                   | -17.67                  | 67.9                  | This work |

94

#### 95 **4. DFT Theoretical Calculations.**

96 Our calculations on the g-C<sub>3</sub>N<sub>4</sub> complex were performed using the plane-wave basis  
 97 Vienna Ab-initio Simulation Package (VASP) code.<sup>14, 15</sup> The projector augmented wave  
 98 (PAW) method was used to describe the electron-ion interaction.<sup>16-18</sup> The exchange-  
 99 correlation functional of generalized gradient approximation GGA-PBE<sup>19, 20</sup> was used for

100 all calculations. The vacuum space was 15 Å, which was enough to separate the  
 101 interaction between periodic images. For geometry optimizations, the Brillouin zone was  
 102 sampled with a Monkhorst-Pack mesh <sup>21</sup> of 1 × 1 × 1 k-points. The cutoff energies for  
 103 plane waves were chosen to be 500 eV, and the convergence tolerance of force on each  
 104 atom during structure relaxation was set at 0.05 eV/Å. The self-consistent field iterations  
 105 were considered converged when the change of total energy was smaller than 10<sup>-5</sup> eV.  
 106 The g-C<sub>3</sub>N<sub>4</sub> layer model was constructed based on the structure of graphite and the  
 107 optimized unit cell parameters were  $a = b = 7.159$  Å,  $c = 15$  Å,  $\alpha = \beta = 90^\circ$ ,  $\gamma = 120^\circ$ .

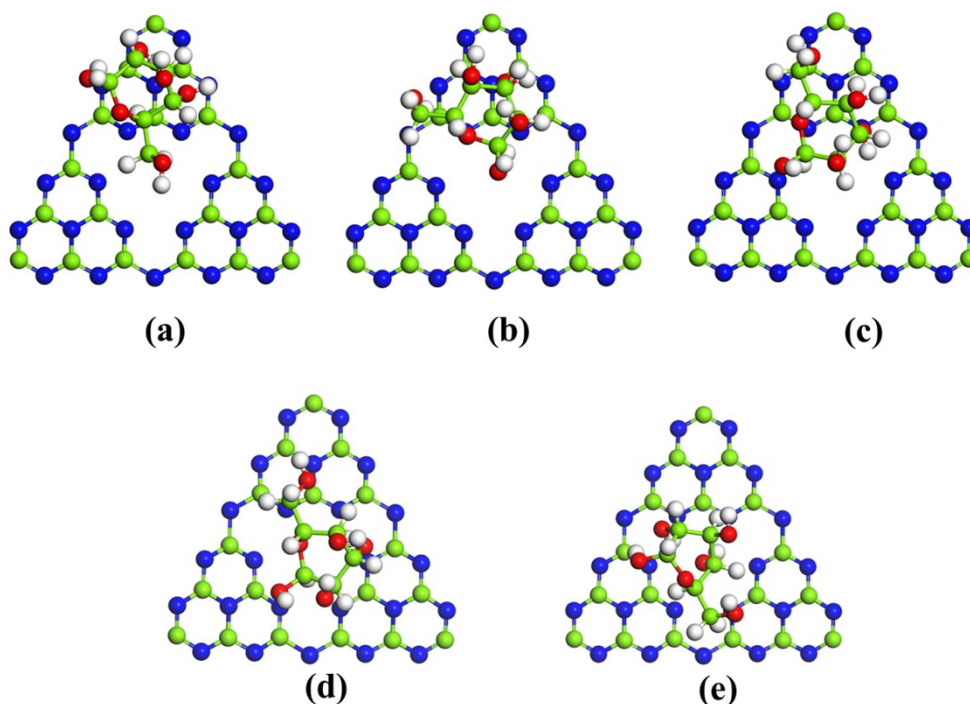

108

109 **Figure S4.** Optimized complexes for g-C<sub>3</sub>N<sub>4</sub> monolayer with  $\beta$ -CD.

110 **Table S7.** The calculated adsorption energies of different structures in Figure S3.

| Types | $E_{ad}$ (eV) |
|-------|---------------|
| a     | 1.07098855    |
| b     | 1.21632674    |
| c     | 1.44367080    |
| d     | 1.43488009    |
| e     | 1.40151666    |

111



112 **Table S8.** The calculated adsorption energies for the adsorption of Pb(II) and MO on g-C<sub>3</sub>N<sub>4</sub> or g-  
 113 C<sub>3</sub>N<sub>4</sub>/β-CD monolayer.

| $E_{ad}$ (eV) | g-C <sub>3</sub> N <sub>4</sub> | g-C <sub>3</sub> N <sub>4</sub> /β-CD |
|---------------|---------------------------------|---------------------------------------|
| Pb            | 3.56                            | 3.74                                  |
| MO            | 1.14                            | 2.11                                  |

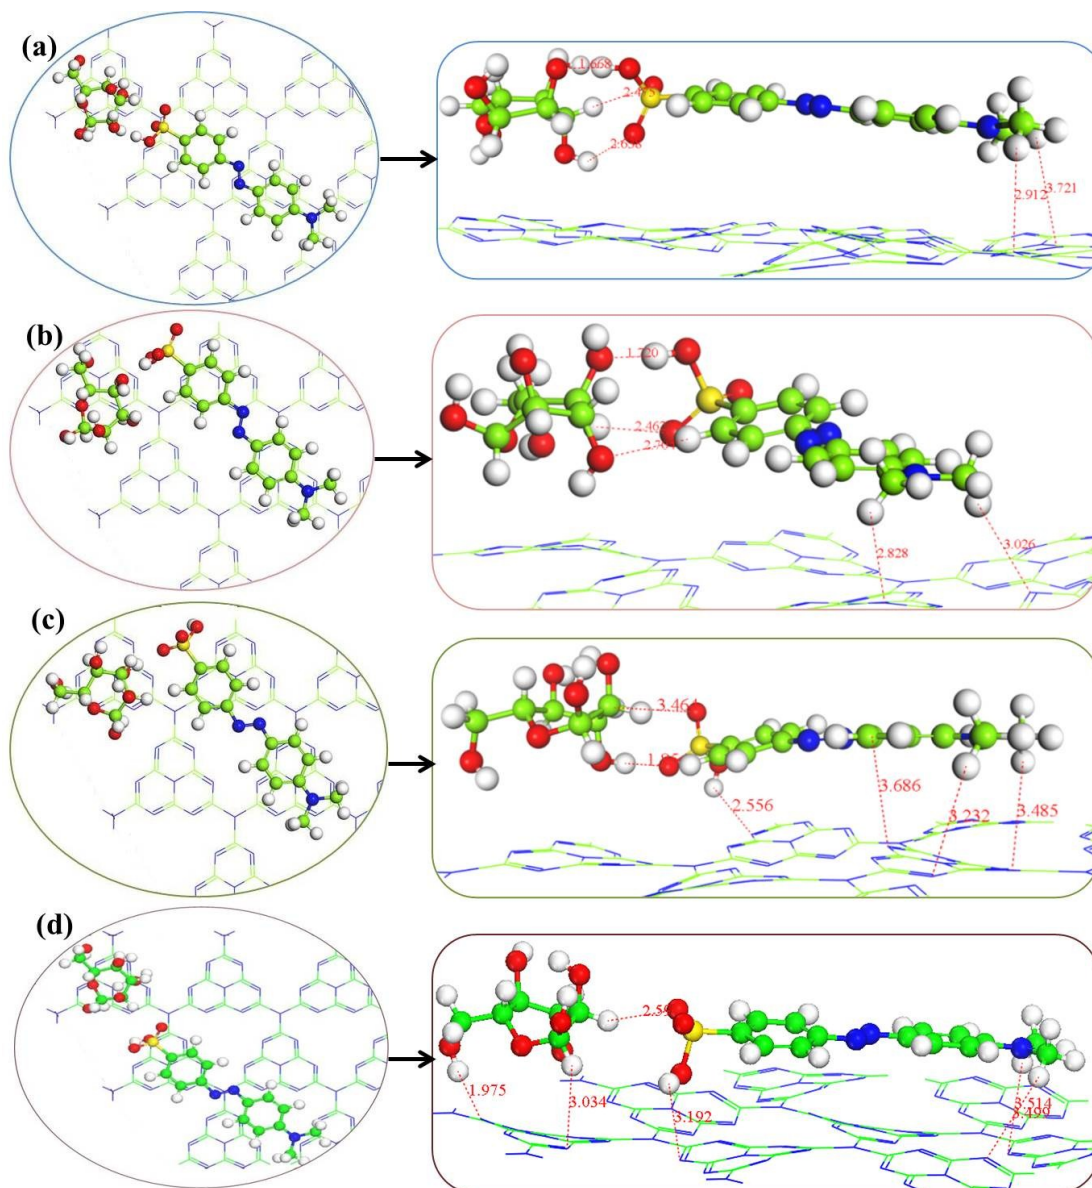

114

115 **Figure S5.** Optimized complexes for g-C<sub>3</sub>N<sub>4</sub>/β-CD monolayer with MO.

116

117

118

119 **Table S9.** The calculated adsorption energies of different structures in Figure S4.

| Types | $E_{ad}$ (eV) |
|-------|---------------|
| a     | 1.91297100    |
| b     | 1.62540239    |
| c     | 1.92972305    |
| d     | 1.67835323    |

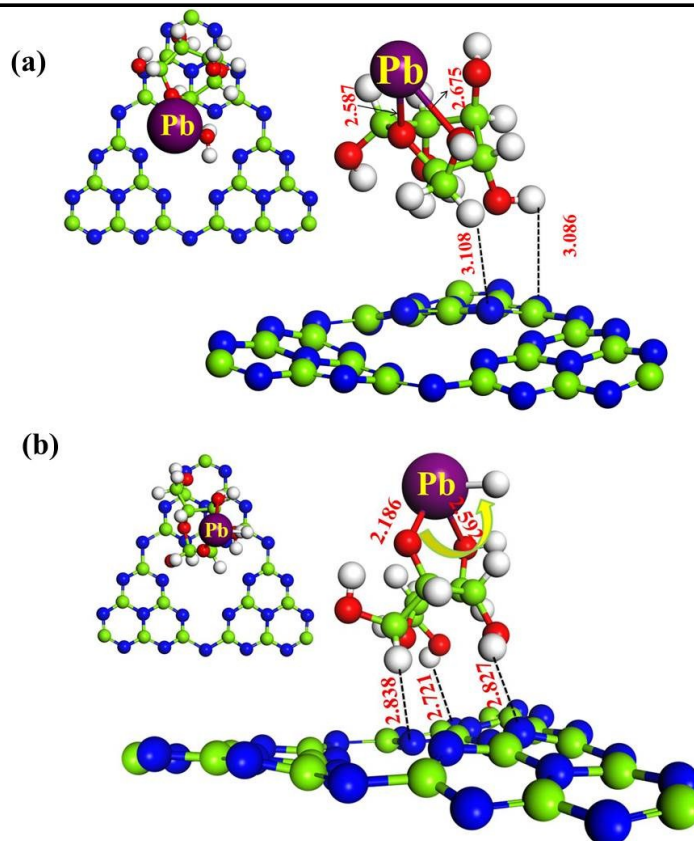

120

121 **Figure S6.** Optimized complexes for g-C<sub>3</sub>N<sub>4</sub>/β-CD monolayer with Pb(II).

122

123 **Table S10.** The calculated adsorption energies of different structures in Figure S5.

| Types | $E_{ad}$ (eV) |
|-------|---------------|
| a     | 1.71547307    |
| b     | 2.76911938    |

124

125 **References:**

126 1. R. Hu, X. K. Wang, S. Y. Dai, D. D. Shao, T. Hayat and A. Alsaedi, *Chem. Eng. J.*,

127 2015, **260**, 469-477.

- 128 2. S. S. Gupta, K. G. Bhattacharyya, *Appl Clay Sci.*, 2005, **30**, 199-208.
- 129 3. S. T. Yang, D. L. Zhao, H. Zhang, S. S. Liu, L. Chen, X. J. Yu, *J. Hazard. Mater.*,  
130 2010, **183**, 632-640.
- 131 4. N. Ünlü, M Ersoz, *J. Hazard. Mater.*, 2006, **136**, 272-280.
- 132 5. N. N. Nassar, *J. Hazard. Mater.*, 2010, **184**, 538-546.
- 133 6. M Erdem, A Özverdi, *Sep. Purif. Technol.*, 2005, **42**, 259-264.
- 134 7. M Sekar, V Sakthi, S Rengaraj, *J. Colloid Interface Sci.*, 2004, **279**, 307-313.
- 135 8. A Sari, M Tuzen, D Citak, M Soylak, *J. Hazard. Mater.*, 2007, **149**, 283-291.
- 136 9. Y. J. Yao, B. He, F. F. Xu, X. F. Chen, *Chem. Eng. J.*, 2011, **170**, 82-89.
- 137 10. H. K. Nourali Mohammadi, Vinod Kumar Gupta, Ehsanollah Amereh, Shilpi  
138 Agarwal, *J. Colloid Interface Sci.*, 2011, **362**, 457-462.
- 139 11. H. Chen, J. Zhao, J. Y. Wu, G. L. Dai, *J. Hazard. Mater.*, 2011, **192**, 246-254.
- 140 12. H.Y. Zhu, R. Jiang, Y. Q. Fu, J. H. Jiang, L. Xiao, G. M. Zeng, *Appl Clay Sci.*,  
141 2011, **258**, 1337-1344.
- 142 13. H.Y. Zhu, R. Jiang, L. Xiao, G. M. Zeng, *Bioresour Technol.*, 2010, **101**, 5063-5069.
- 143 14. G. Kresse, J. Furthmüller, *Comput. Mater. Sci.*, 1996, **6**, 15-50.
- 144 15. G. Kresse, J. Furthmüller, *Phys. Rev. B*, 1996, **54**, 11169-11186.
- 145 16. P. E. Blöchl, *Phys. Rev. B*, 1994, **50**, 17953-17979.
- 146 17. G. Kresse, D. Joubert, *Phys. Rev. B*, 1999, **59**, 1758-1775.
- 147 18. M. Methfessel, A. T. Paxton, *Phys. Rev. B*, 1989, **40**, 3616-3621.
- 148 19. J. P. Perdew, K. Burke, M. Ernzerhof, *Phys. Rev. Lett.*, 1996, **77**, 3865-3868.
- 149 20. J. P. Perdew, K. Burke, M. Ernzerhof, *Phys. Rev. Lett.*, 1997, **78**, 1396-1401.
- 150 21. H. J. Monkhorst, J. D. Pack, *Phys. Rev. B*, 1976, **13**, 5188-5192.
